# Supplementary material for: Decreased Gut Microbiome Tryptophan Metabolism and Serotonergic Signaling in Patients With Persistent Mental Health and Gastrointestinal Symptoms After COVID-19
Source: PubMed Central journal article supplement — Clin Transl Gastroenterol. 2022 Aug 31;13(10):e00524. doi: 10.14309/ctg.0000000000000524 (PMC9624499; doi:10.14309/ctg.0000000000000524), 2022-08-31
Supplement: ct9-13-e00524-s002.pdf [file ct9-13-e00524-s002.pdf]

## SUPPLEMENTAL FIGURES

**Figure S1.** Cohort 1: Gut microbiome tryptophan metabolism during acute COVID-19, stratified based on gastrointestinal and mental health symptoms at 6 months of follow-up.

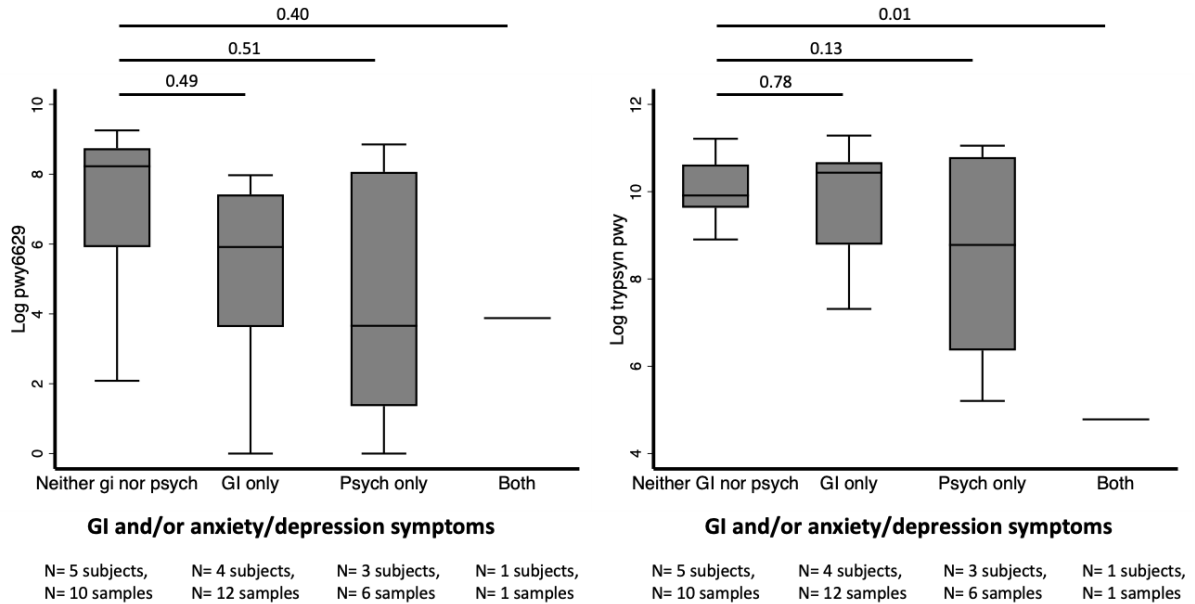

On the left, PWY-6629, organized by gastrointestinal and mental health symptoms. On the right, TRYPSPWPY, similarly organized. P-values are shown for a repeated measures mixed model incorporating between- and within-subjects effects.

**Figure S2.** Cohort 1: Impact of prebiotic fiber given during acute COVID-19 on gut microbiome tryptophan metabolism.

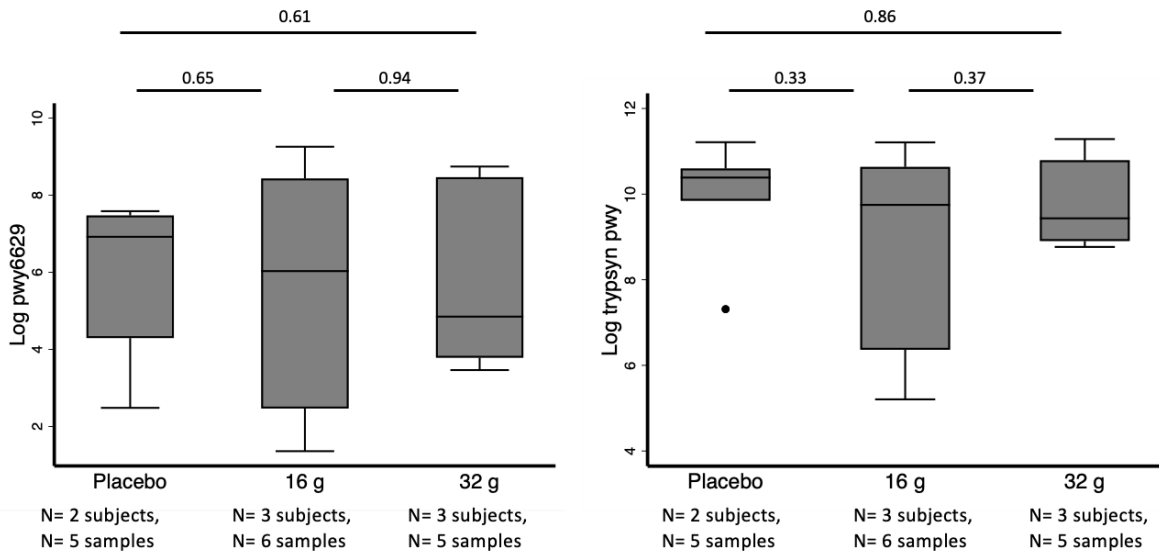

On the left, PWY-6629, organized by study intervention assignment. On the right, TRYPSPY, similarly organized. P-values are shown for a repeated measures mixed model incorporating between- and within-subjects effects.

**Figure S3.** Cohort 1: Gastrointestinal symptoms after COVID-19, organized based on study intervention assignment.

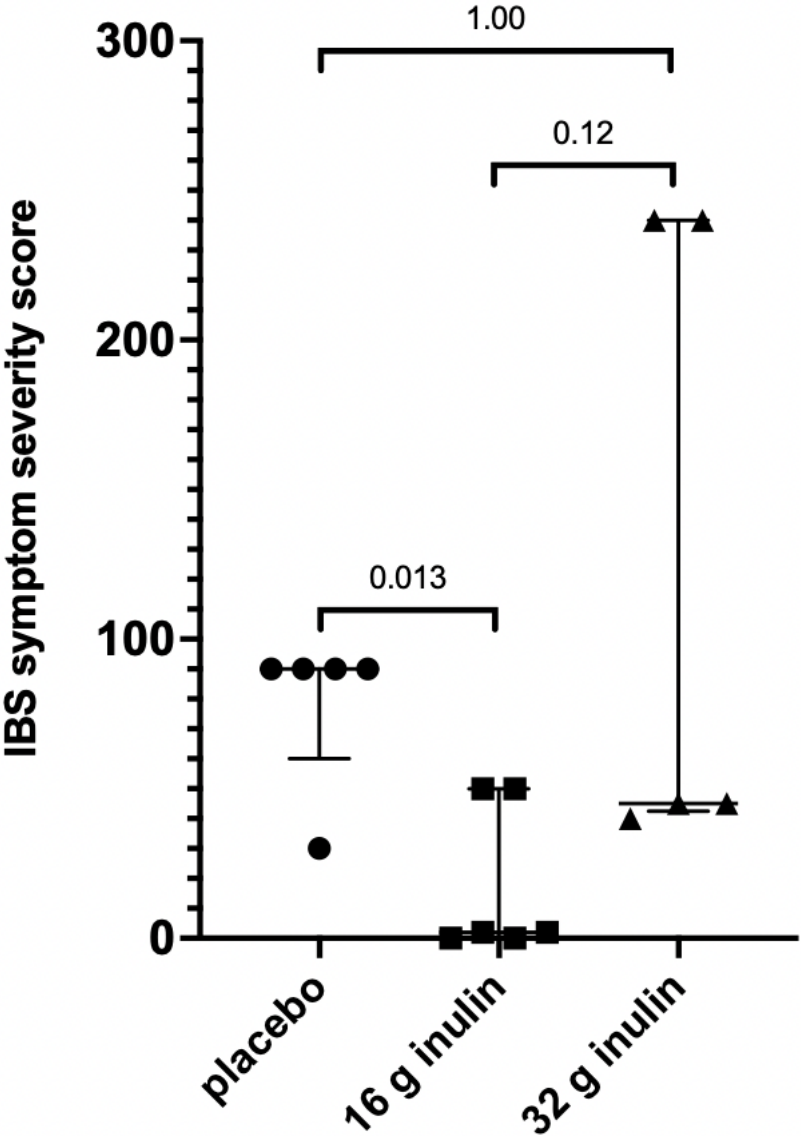

IBS symptom severity score (IBS-SSS) was assessed six months after the diagnosis of COVID-19.
